# Supplementary material for: In situ study of the impact of acidic and neutral deposition pH on alkane phosphate film formation and stability on TiO2
Source: Royal Society of Chemistry journal article supplement (doi:10.1039/c2ra22643j), 2012-12-06
Supplement: c2ra22643j.pdf [file c2ra22643j.pdf]

**Supplementary Information.**

**In situ study of alkane phosphate film formation and stability on TiO<sub>2</sub>**

Stephen A. Holt\*<sup>a</sup> Anton P. Le Brun<sup>a</sup> Andrew R.J. Nelson<sup>a</sup> and J.H. Lakey

**Table S1.** Calculated SLD values, assuming Headgroup and Tail molecular volumes of 213.78 and 59.55 Å<sup>3</sup> respectively.

| Material            | SLD (x 10 <sup>-6</sup> Å <sup>-2</sup> ) |
|---------------------|-------------------------------------------|
| Silicon             | 2.07                                      |
| Silicon Oxide       | 3.47                                      |
| Titanium Oxide      | 2.36                                      |
| Phosphate Headgroup | 4.76                                      |
| Dodecyl Tail        | -0.622                                    |
| H <sub>2</sub> O    | -0.55                                     |
| D <sub>2</sub> O    | 6.35                                      |

Below are figures summarising the data and fitting from the NR pH series experiments. In all cases only D<sub>2</sub>O buffer datasets have been shown. Data was recorded for each step in the pH range from 4.5 to 9.5 was with D<sub>2</sub>O and/or TiO<sub>2</sub>M subphases. In Figure S1 at pH 4.5 data washed was only collected with a TiO<sub>2</sub>M subphase hence there is no dataset on the figure. Similarly for the pH 7.0 preparation series there is no D<sub>2</sub>O dataset a pH 5.5.

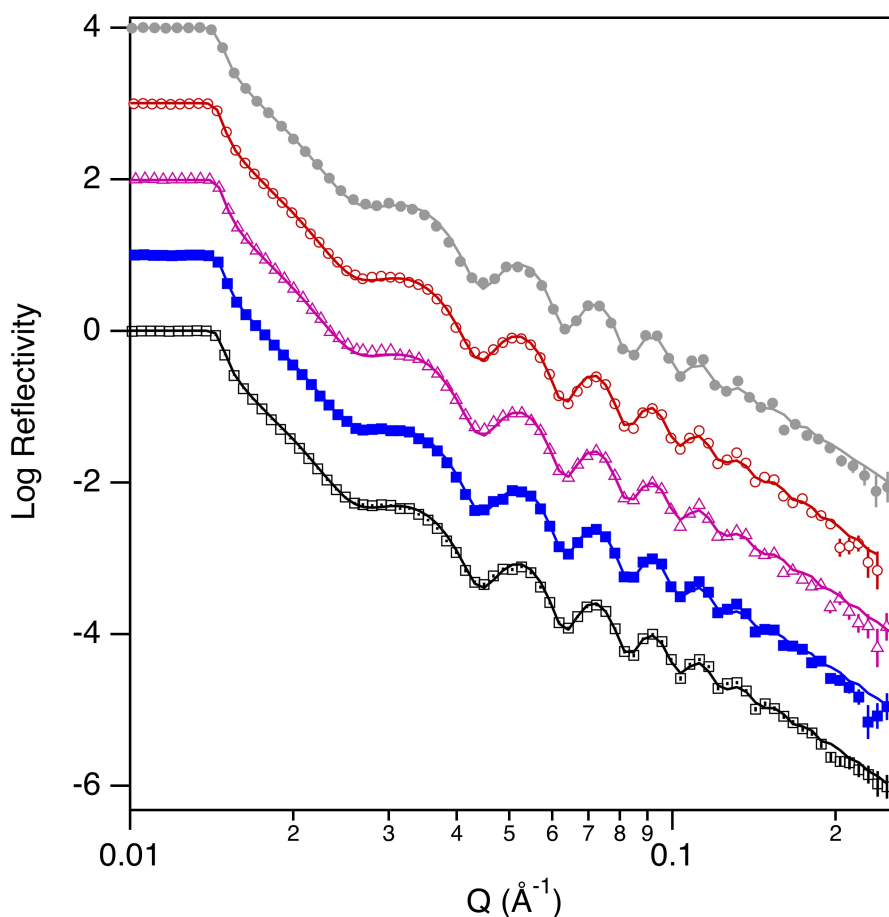

**Figure S1a.** NR data (symbols) and fits (lines) for a dodecyl phosphate film prepared at pH 4.5 with an incubation time of 1140 minutes. Black – pH 5.5; Blue – pH 6.5; Magenta – pH 7.5; Red – pH 8.5, Grey – pH 9.5.

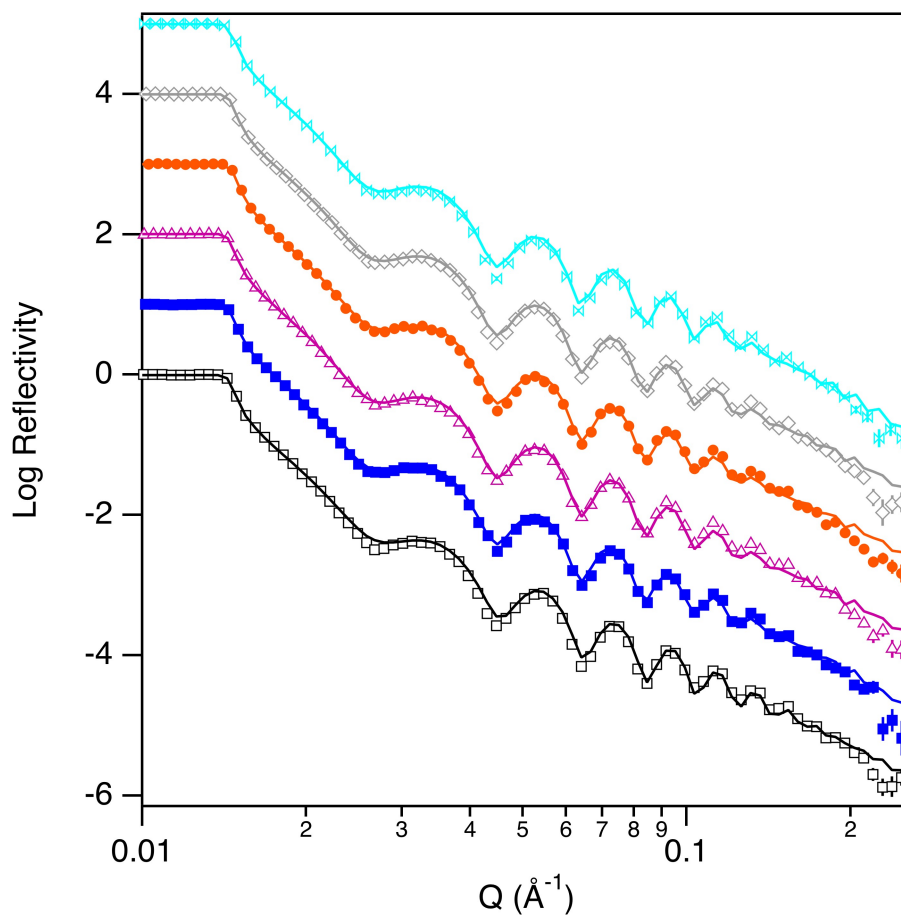

**Figure S1b.** NR data (symbols) and fits (lines) for a dodecyl phosphate film prepared at pH 7.0 with an incubation time of 1020 minutes. Black – pH 7.0; Blue – pH 4.5; Magenta – pH 6.5; Red – pH 7.5, Grey – pH 8.5; Cyan – pH 9.5.
